## Suicide in Asia: Opportunities and Challenges

Ying-Yeh Chen, Kevin Chien-Chang Wu, Saman Yousuf, and Paul S. F. Yip\*

\* Correspondence to Dr. Paul S. F. Yip, Centre for Suicide Research and Prevention, The University of Hong Kong, Pokfulam, Hong Kong, China (e-mail: sfpyip@hku.hk).

*Accepted for publication September 8, 2011.*

Asian countries account for approximately 60% of the world's suicides, but there is a great mismatch in the region between the scale of the problem and the resources available to tackle it. Despite certain commonalities, the continent itself is culturally, economically, and socially diverse. This paper reviews current epidemiologic patterns of suicide, including suicide trends, sociodemographic factors, urban/rural living, suicide methods, sociocultural religious influences, and risk and protective factors in Asia, as well as their implications. The observed epidemiologic distributions of suicides reflect complex interplays among the traditional value/culture system, rapid economic transitions under market globalization, availability/desirability of suicide methods, and sociocultural permission/prohibitions regarding suicides. In general, compared with Western countries, Asian countries still have a higher average suicide rate, lower male-to-female suicide gender ratio, and higher elderly-to-general-population suicide ratios. The role of mental illness in suicide is not as important as that in Western countries. In contrast, aggravated by access to lethal means in Asia (e.g., pesticide poisoning and jumping), acute life stress (e.g., family conflicts, job and financial security issues) plays a more important role than it does in Western countries. Some promising suicide prevention programs in Asia are illustrated. Considering the specific socioeconomic and cultural aspects of the region, community-based suicide intervention programs integrating multiple layers of intervention targets may be the most feasible and cost-effective strategy in Asia, with its populous areas and limited resources.

Asia; primary prevention; suicide

### INTRODUCTION

It is estimated that suicides claim approximately 1 million lives worldwide every year, and as many as 60% occur in Asia (1, 2). If commonly used estimates are applied to Asia, namely, approximately 10–20 times as many suicide attempts as deaths and 5–6 people affected by each suicide death, more than 60 million people may be affected by suicide annually (1). Yet despite such compelling figures and the fact that it is an enormous public health issue, suicide receives relatively less attention than it does in the West (3), resulting in underemphasis on related research and fragmented preventive approaches (4, 5).

A crucial challenge in studying suicide in Asia is the availability and quality of suicide data for monitoring and surveillance (1, 6). For approximately 20% of the population, suicide data are not available (6, 7). In countries where data are available, there are problems of underestimation due to inaccurate ascertainment and delay in reporting suicide deaths. Social, cultural, and religious elements affect the reporting of suicide and are compounded by poor population estimates

(1, 3, 5, 7, 8). In Hong Kong, Japan, Malaysia, Singapore, South Korea, and Taiwan, the procedure of certifying suicide is regarded as more reliable (4, 9). In these countries, all reported or suspected suicides need to be examined by a coroner, medical examiner, or forensic pathologist, and usually with a police investigation report to make sure the event is not a homicide. All certificates must be registered with the health department; thus, the quality of suicide estimates is considered reliable.

In contrast, the quality of suicide estimates in China, India, Thailand, and Sri Lanka is considered poor to fair (4). In these countries, there may be substantial underreporting. For example, in China, the official suicide rate is based on a random sampling of 145 surveillance sites, not a complete count of the entire population (10, 11). Similarly, in populous India, underreporting may be even worse because suicide is still regarded as illegal. In many other Asian countries such as Pakistan and Vietnam, national statistics on suicide are simply unavailable (4). When such limitations in the accuracy of suicide data are taken into account, the overall suicide rate in Asia is approximately 19.3 per 100,000, about 30% higher than the global rate of 16.0 per 100,000 (12, 13).

The epidemiologic patterns, risk, and protective factors of suicide in Asia are substantially different from those in Western countries, which are the source of the majority of the suicide literature (4, 14). Because of rapid transitions in the social and economic structures experienced by many countries in the region recently, as well as limited and underdeveloped mental health services, the mental well-being of the community is expected to worsen and suicide rates are expected to rise in the next 2 decades (15). Since suicide is the leading cause of death relative to other causes among younger adults, the potential years of life lost and the associated socioeconomic burden imposed by suicide are substantial in the region (16–18). Considering the scale of the problem and the foreseeable vicissitude of suicide in the region, an in-depth and comprehensive review of the current status of and recent trends in suicide in Asia is timely and will make a tremendous impact on suicide prevention at a global level.

This review describes the latest epidemiologic patterns of suicide in Asian countries where reliable data are available, and it highlights risk and protective factors for suicide. Considering the specific epidemiologic distributions, we also review some existing suicide prevention programs and propose future directions for suicide research and intervention measures in Asia.

## METHODS

The US National Library of Medicine's PubMed electronic database, PsycInfo, Embase, and ISI Web of Science were searched by using the title and abstract search terms "suicide" in combination with each individual country in Asia (e.g., "suicide" and "Japan"). Articles related to epidemiologic studies including age, gender, method, geographic patterns, and risk/protective factors of suicide from January 2000 to April 2011 were retrieved. All psychological autopsy studies and intervention studies available in the region were also searched without restricting the period of search.

Articles dealing with other suicidal behaviors, such as suicide ideation and attempted suicide, were excluded. A literature search based on the Chinese search engines "China journals full-text database" (www.cnki.net) was performed by using the Chinese keywords "epidemiology" and "suicide." The search yielded 3 articles. The results of the literature search are presented in Table 1. Countries that yielded 0 articles (e.g., Philippines and Cambodia) were not listed in this table. Since more than 100 epidemiologic studies were identified, key findings from these studies were reviewed. (The complete list of retrieved articles is available from the authors upon request.)

The reference lists of articles identified by the search strategy were also searched for relevant articles. Reviews and book chapters were cited to provide opportunities for further reading. From the electronic database search, 9 East and Southeast Asian countries able to provide epidemiologic data on suicide for the current review were located. These countries were China, Hong Kong, India, Japan, Singapore, South Korea, Sri Lanka, Taiwan, and Thailand. Despite the more than 30 countries in this part of world, only these 9 were selected because they had shown either some unique features (e.g., risk

factors, distributions) or some significant changes in the suicide patterns (e.g., change in prevalence, methods used) in the past decade. We did not aim to review every country in Asia exhaustively in view of space constraints. These selected countries provided insights and helped further the discussion of suicide prevention in the region. The population in the 9 selected countries represented more than 40% and 90% of the world and Asia populations, respectively.

## RESULTS

### Epidemiologic characteristics

**Suicide rate trend.** Countries in Asia are very different in terms of socioeconomic development, religious beliefs, population size, gross national product, and literacy and suicide rates (3). Whenever possible and unless otherwise specified, we present the latest published suicide statistics and provide the sources of information (Figure 1). Countries with low suicide rates include Thailand and China at 5.7 and 6.6 per 100,000, respectively, followed by Singapore (8.0) and India (10.9). Hong Kong and Taiwan, with rates of 13.8 and 17.6, respectively, are countries with medium suicide rates (i.e., 12.0–18.0). The high-rate countries (>18.0) include Japan (24.0), South Korea (31.0), and Sri Lanka (23.0) (Figure 1).

The latest trends in countries for the period 1995–2009 are shown in Figure 2. China, Sri Lanka, and Singapore showed a steady decline. The magnitude of reduction in Sri Lanka for the period was phenomenal, from 46.9 to 20.3. No substantial change was observed in Thailand and India, whereas suicide rates for Japan, South Korea, and Taiwan increased significantly since 1995 and remained at a high level and above the global average (16.0). The ever-increasing trend in South Korea is worrisome and reached a historical high of 31.0 in 2009. The 3-fold increase in Taiwan for the same period is also disturbing (from 7.6 in 1995 to 17.6 in 2009). In Japan, the suicide rate increased abruptly during the Asian financial crisis in 1997, from 17.0 in 1995 to 24.0 in 1997, and has remained at this high level ever since. News from Hong Kong is somewhat encouraging, where the suicide rate increased from 12.0 to 18.6 for the period 1997–2003 and then decreased and leveled off to about 13.8 in 2009. The Hong Kong suicide rate went up by more than 50% in the first 6 years and decreased by 25% in the later 6 years.

**Age and gender patterns of suicide.** Unlike in Western countries, where suicide rates for males are about 3–4 times higher than those for females (19), in several Asian countries, the gap between male and female suicide rates is smaller (Figure 3). For example, Australia and Hong Kong have similar suicide rates, but the gender ratios (male-to-female) are about 4 and 2, respectively. This finding implies that the suicide rate for females in Hong Kong is relatively higher than that for Australian females, whereas a relatively lower rate is observed for Hong Kong males compared with Australian males. The gender ratio in the United States was 3.8 in 2009.

China still has the smallest male-to-female gender ratio of all selected countries. Total female suicides outnumbered male suicides before 2005, but the number of male suicides has increased since; the latest gender ratio was 1.2 in 2009. The

**Table 1.** Summary of the Literature of Suicide Studies in Asia

| Country     | Epidemiologic Studies             |                                      |                                              |                                                    |                                | No. of Psychological Autopsy Studies | No. of Intervention Studies |
|-------------|-----------------------------------|--------------------------------------|----------------------------------------------|----------------------------------------------------|--------------------------------|--------------------------------------|-----------------------------|
|             | Initial No. of Articles Retrieved | No. of Articles Excluded             |                                              |                                                    | Final No. of Articles Reviewed |                                      |                             |
|             |                                   | Not Representative of the Population | Other Suicidal Behavior (Ideation, Attempts) | Not Directly Relevant, Reviews, Case Reports, etc. |                                |                                      |                             |
| Afghanistan | 1                                 | 1                                    | 0                                            | 0                                                  | 0                              | 0                                    | 0                           |
| Bangladesh  | 14                                | 7                                    | 3                                            | 4                                                  | 0                              | 0                                    | 0                           |
| China       | 188                               | 48                                   | 69                                           | 60                                                 | 11                             | 8                                    | 4                           |
| Egypt       | 7                                 | 4                                    | 0                                            | 3                                                  | 0                              | 0                                    | 0                           |
| Hong Kong   | 166                               | 29                                   | 45                                           | 73                                                 | 19                             | 5                                    | 9                           |
| India       | 202                               | 75                                   | 25                                           | 97                                                 | 4                              | 4                                    | 3                           |
| Indonesia   | 2                                 | 1                                    | 1                                            | 0                                                  | 0                              | 1                                    | 0                           |
| Iran        | 92                                | 40                                   | 39                                           | 12                                                 | 0                              | 0                                    | 1                           |
| Iraq        | 1                                 | 1                                    | 0                                            | 0                                                  | 0                              | 0                                    | 0                           |
| Israel      | 39                                | 3                                    | 10                                           | 23                                                 | 3                              | 2                                    | 0                           |
| Japan       | 369                               | 117                                  | 82                                           | 155                                                | 15                             | 2                                    | 4                           |
| Jordan      | 5                                 | 2                                    | 0                                            | 3                                                  | 0                              | 0                                    | 0                           |
| Kuwait      | 2                                 | 0                                    | 0                                            | 2                                                  | 0                              | 0                                    | 0                           |
| Lebanon     | 3                                 | 0                                    | 2                                            | 1                                                  | 0                              | 0                                    | 0                           |
| Malaysia    | 24                                | 7                                    | 4                                            | 12                                                 | 1                              | 0                                    | 0                           |
| Nepal       | 16                                | 3                                    | 9                                            | 3                                                  | 1                              | 0                                    | 0                           |
| Oman        | 3                                 | 0                                    | 3                                            | 0                                                  | 0                              | 0                                    | 0                           |
| Pakistan    | 39                                | 9                                    | 14                                           | 14                                                 | 2                              | 1                                    | 0                           |
| Palestine   | 1                                 | 0                                    | 0                                            | 1                                                  | 0                              | 0                                    | 0                           |
| Singapore   | 22                                | 1                                    | 4                                            | 10                                                 | 7                              | 0                                    | 1                           |
| South Korea | 32                                | 2                                    | 9                                            | 8                                                  | 13                             | 0                                    | 1                           |
| Sri Lanka   | 58                                | 20                                   | 9                                            | 27                                                 | 2                              | 2                                    | 1                           |
| Taiwan      | 178                               | 36                                   | 44                                           | 71                                                 | 27                             | 2                                    | 2                           |
| Thailand    | 19                                | 3                                    | 5                                            | 7                                                  | 4                              | 0                                    | 0                           |
| Turkey      | 143                               | 42                                   | 61                                           | 37                                                 | 2                              | 1                                    | 0                           |
| Vietnam     | 0                                 | 0                                    | 0                                            | 0                                                  | 0                              | 0                                    | 1                           |

observed low gender ratios in India and China come from the high rates for young women, especially in rural regions (4, 20). Narrower male/female suicide ratios are also found in other Chinese communities such as Taiwan, Hong Kong, and Singapore (21, 22). However, an increasing male-to-female suicide gender ratio was also observed in all 3 societies in the past decade. In Singapore, the increasing suicide gender ratio is due to decreased suicides of young women (23); in Taiwan and Hong Kong, it is mainly driven by the increased use of charcoal-burning suicide by middle-aged men (24).

Despite the veneration and respect for older adults in East Asia (e.g., China, South Korea, Hong Kong, Taiwan, and Singapore), where Confucianism is practiced, suicide rates for the older age group are paradoxically high. The elderly-to-general-population suicide ratio ranges from 4 to 6 (25–27). Although suicide rates are also higher for older adults in Western countries, especially males, the elderly-to-general-population ratio is not as striking as that observed in East Asian countries.

Japan is an exception. Traditionally, it has the highest suicide rate for the elderly. However, after the Asian finan-

cial crisis of 1997–1998, the suicide rate for middle-aged men (50–59 years) surpassed that for the older age group ( $\geq 65$  years) (28, 29). In Thailand, the highest suicide rates are found for young men (aged 25–34 years), a group at the height of its productive years (30). A posited explanation is chaotic sexual relationships, human immunodeficiency virus infection, and alcohol abuse, especially in the central part of Thailand (30, 31). The sources of data for the figures are provided in the Appendix.

**Urban/rural patterns of suicide.** After the 1990s, increased suicides in rural areas, particularly among males, have been reported in many Western countries (32, 33). Higher rural rates are also found in several Asian countries, including India, Sri Lanka, Japan, Taiwan, and China (10, 34–38). Rural disadvantage in suicide rate trends can be caused by the relative deprivation, stigma and/or insufficient knowledge of mental illness, social isolation and disconnection, difficulty in accessing services, and ready access to lethal means of suicide (e.g., pesticides) (32, 33).

Particularly disturbing is the high rural suicide rate in China, where it is 2–3 times higher than in urban areas (10, 36). The

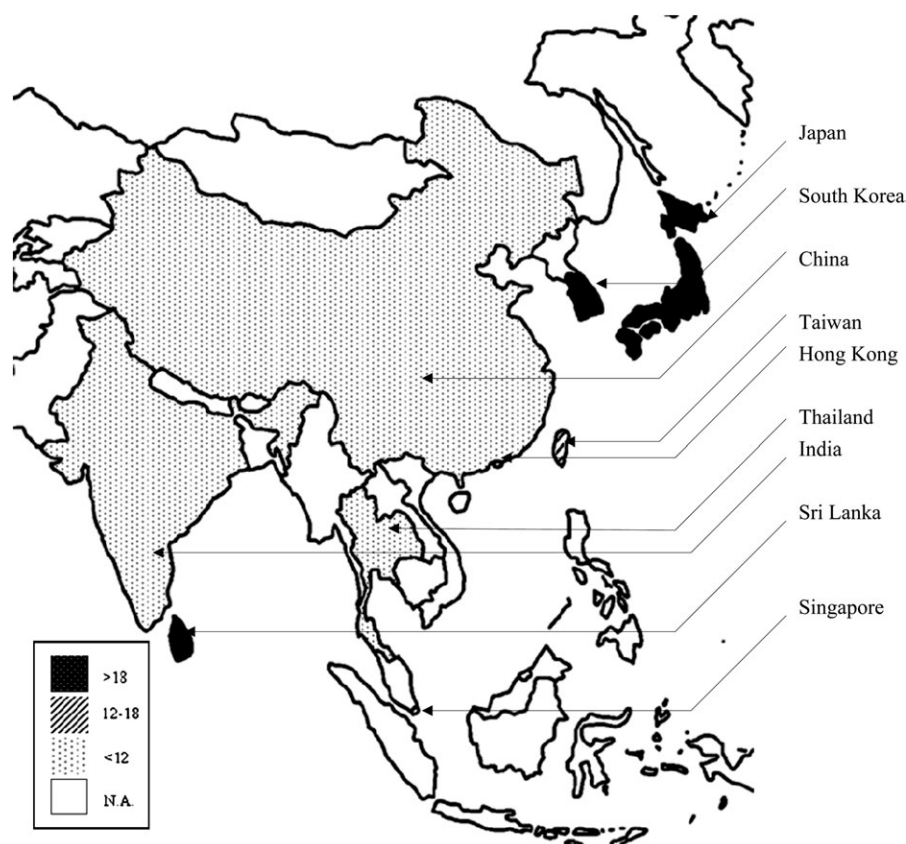

**Figure 1.** Suicide rates (per 100,000) in the 9 selected countries/regions of Asia, 2009. N.A., data not available.

distinctive age and gender patterns of suicide observed in China are further divided along rural versus urban lines. The rural-urban gap of up to 5-fold is found among the elderly and among young women aged 25–34 years (10, 36). Since traditional values and practices (e.g., dominance of the extended family system, filial piety) are most entrenched in rural areas, rapid social changes in China may be taking a heavier toll there (39).

### Risk and protective factors for suicide

*Individual-level risk/protective factors from psychological autopsy studies.* Researchers in several Asian countries have conducted psychological autopsy studies to elucidate risk factors for suicide (Table 2). The identified risk factors, such as mental disorders, substance/alcohol misuse, prior history of suicide attempt, and an acute life event, are very similar to research findings in Western countries. However, the reported prevalence of depression or other psychiatric diagnoses among suicides is lower than that in Western countries. For example, in a Chennai study (India), mood disorder was found in only 25% of the sample, although 88% of the cases had mental disorders (40). In a more recent psychological autopsy study conducted in rural south India, major depression was found in only 2% of suicide cases (41).

In China, Phillips et al. (42) reported that 40% of suicides suffered from depression and that the overall rate of mental disorders in suicide completers is 63%. The prevalence of mental disorders is reportedly even lower among young rural Chinese suicide victims, at less than 50% (43, 44). In Hong Kong, depression was found in 51% and 53% of middle-aged and old adult suicides, respectively (45, 46). However, a psychological autopsy study in eastern Taiwan consisting of mainly rural and indigenous people found the rate of depression in suicide victims to be 87%, comparable to results of many Western studies (47). A recent study from Bali, Indonesia, also found a high prevalence of mental disorders (80%) among suicides (48).

The frequency of any mental disorder among suicides in Asian countries derived from psychological autopsy studies ranges from 37% to 97%–100% (Table 2). The prevalence of mood disorders and of alcohol-related disorders is in the range of 2%–87.1% and 2.9%–56.7%, respectively. Several factors may contribute to the variations. First, the distribution of mental disorders differs among different cultures and countries in Asia. Second, diagnostic tools used to elicit mental disorders may vary across different studies. Third, methods of interviewing (e.g., personnel training, interview structure) may lead to both underdiagnosis and overdiagnosis of mental disorders (49).



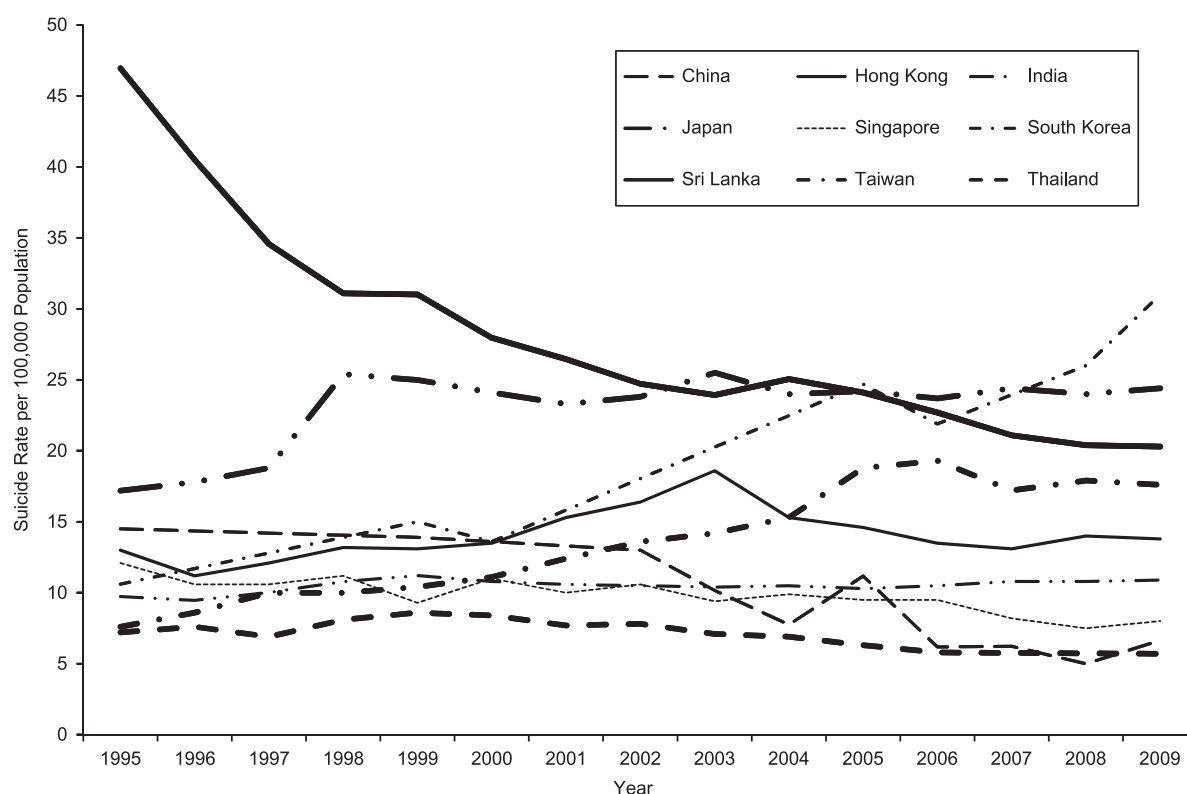

**Figure 2.** Suicide rates (per 100,000) for males and females in 9 selected countries/regions of Asia, 1995–2009.

Acute life stresses such as job loss, gambling, and work-related factors are important precipitants of suicide among Asian men (42, 50, 51), whereas family conflicts are a key risk factor for Asian women (42, 52). Financial problems are more commonly found among suicides in Asia than in the West (53). A study of the unemployed in Hong Kong identified social support and hope as 2 important protective factors (54, 55). The role of acute life stresses seems to be more significant in Asia than in the West, particularly for those who do not have diagnosed psychiatric disorders. Yang et al. (56) examined the interrelationships among urban/rural residents, gender, methods of suicide, and acute life stress in China. They found that, of all sex/age groups, young rural women who died from suicide had the highest rate of pesticide ingestion, lowest rate of mental illness, and highest rate of acute events prior to suicide.

*Physical environment and sociocultural conditions associated with risk/protective factors.* Physical environment: availability of suicide methods. International variations in the distribution of methods of suicide generally reflect the availability of methods used (57). In Asian countries with large rural populations, such as China, India, and Sri Lanka, pesticide poisoning is the most common method (10, 58–60). Pesticide poisoning is also a common suicide method in rural areas of several well-developed Asian countries such as South Korea and Taiwan (61–63). In South Korea, the incidence of suicide from pesticide poisoning has continued to rise in the

last decade, and this method is currently the second most common in that country (29, 64).

Although pesticide poisoning is a common problem in rural areas of Asia, the dramatic increase in charcoal-burning suicide (carbon monoxide poisoning by burning charcoal in a closed space) in urban Taiwan and Hong Kong is worth noting (65). After widespread media publicity (print media and the Internet), it has emerged as one of the leading methods of suicide in these 2 places (65, 66). Furthermore, the method has spread to other Asian countries such as Japan, where it now accounts for 8% of all suicides (67).

In addition to charcoal burning, recent media reporting of suicide by hydrogen sulfide poisoning (mixing a bath additive and toilet detergent to produce hydrogen sulfide gas) claimed 208 lives in less than 3 months in Japan in 2008 (68). The toxic gas threatened the rescuers and neighbors as well and has become a significant method of suicide.

Jumping from a height is the most common method of suicide in Hong Kong and Singapore, where more than 90% of residents live in high-rise buildings. It is also a common method in other populated Asian cities such as Taipei (21, 69, 70). The method is particularly common among older citizens because it is easily accessible, assuredly lethal, and technically simple for physically fragile older adults residing in tall buildings (21, 70, 71). Moreover, jumping from residential buildings is also commonly adopted by youths whose suicides are impulsive (21, 72). However, there are still

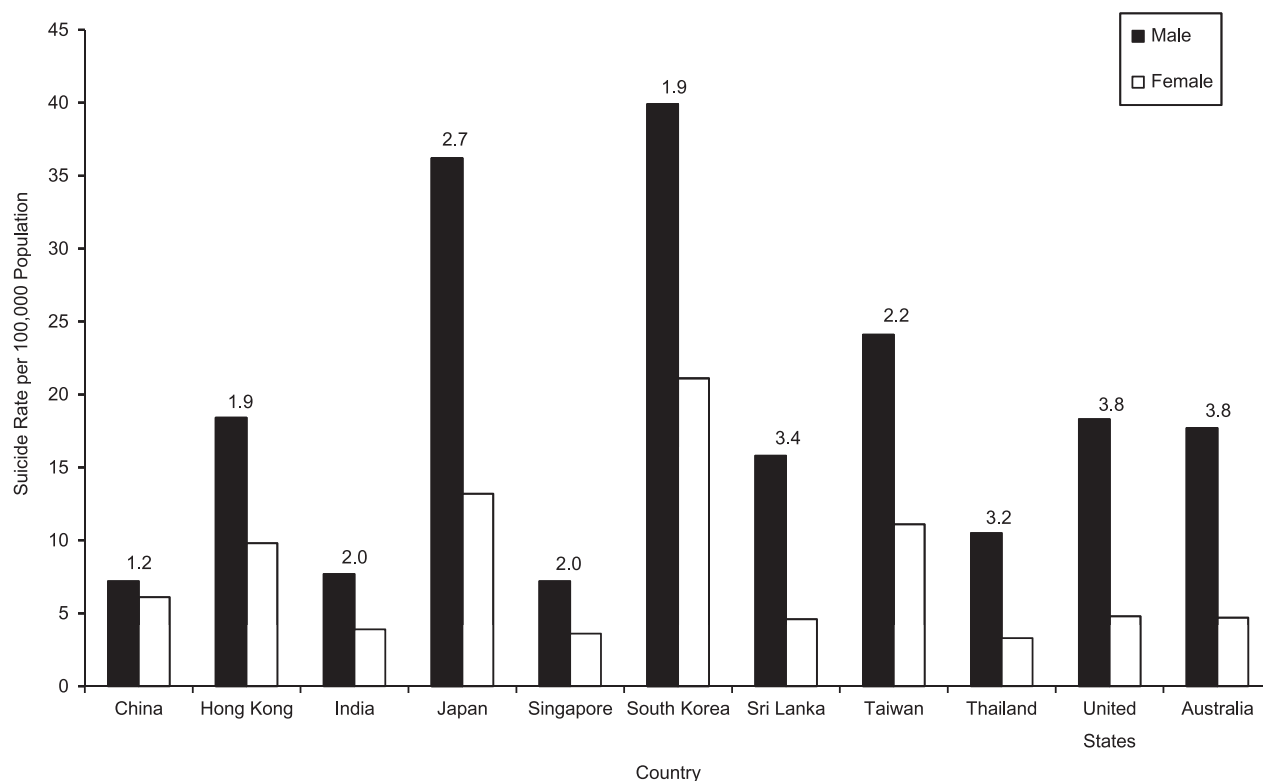

**Figure 3.** Gender-specific suicide rates and male-to-female suicide gender ratio in 9 selected Asian countries and 2 comparative Western countries (Australia and the United States), 2009.

differences in the proportion of those using jumping as a suicide method (80% vs. 50%) in Singapore and Hong Kong despite similarities in the percentage of high-rise buildings in these 2 areas. Other factors, including competition from other methods perceived as more appealing in Hong Kong (e.g., charcoal-burning suicide), may cause the observed differences (73). The factors availability and acceptability are indeed a major concern in the choice of a suicide method.

Suicide by hanging is the most common method of suicide in many Asian countries, such as Japan, Korea, and Taiwan. In fact, hanging is also the most common method in many Western countries (57, 74).

**Sociocultural conditions.** Asian countries have traditionally been characterized by the dominance of the extended family system, and individual interests are generally secondary to those of kinship or family (75). The fact that being married is not necessarily a protective factor for female suicide may be partially explained by the characteristics of family relationships in Asia, where young married women are situated in the lowest rank (52, 76). In India, it is estimated that 98.7% of suicides of women involved dowry disputes (60). When dowry expectations are not met, the young brides may be harassed and abused, and many die from self-immolation (60). The marked rise of familicide-suicide perpetrated by a male household head when facing job loss in some Asian countries is also an expression of the family-centered culture (77). The number of familicide-suicides has increased considerably in

the last decade because of the widespread use of charcoal-burning suicide, which makes a suicide pact easier to carry out (77).

At the individual level, unemployment or job-related stress is a more common precipitant of suicide among Asian men compared with their Western counterparts (42, 50). Similarly, at the contextual level, societal economic situations seem to have greater impact in Asia. For example, a recent meta-analysis of the association between suicide and socioeconomic characteristics of geographic areas showed that studies from Asian countries, compared with research from the West, were more likely to have found a significant impact from adverse socioeconomic conditions on increased suicide rates (78).

Suicide is culturally sanctioned in some circumstances in Asia. Examples include the Hara-kiri (belly cutting), an honorable and altruistic suicide practiced in Japan (79), and the “Suttee,” a socially acceptable form of self-immolation by widows in India (34).

The role of religion and suicide in Asia is more complex. Islam provides clear rulings about suicide and alcohol (an important risk factor for suicide). Thus, Muslim countries generally have lower suicide rates. Malays in Singapore also have a lower suicide rate than the rates of other ethnic groups such as Indians and Chinese (4). Countries that have a stronger religious identity tend to have lower suicide rates, such as the practice of Buddhism in Thailand (5.7 per 100,000) and Catholicism in the Philippines (5.0 per 100,000). The protective

effect of religion against suicide may be mediated by the degree to which a given religion sanctions, or prohibits, suicide (4).

However, the protective effect of other religions is not clear in Asia. For example, one study from China indicated that religious affiliation predicted a higher suicide risk (52). In fact, religious practice in many Chinese communities involves a mixture of Buddhism and local religions, and the myth of incarnation may inadvertently sanction suicide as an acceptable solution.

### Suicide intervention programs

Since suicide is a relatively underresearched area in Asia, evidence on the effectiveness of prevention programs is limited. Nevertheless, in many Asian countries, both government and nongovernment organizations have been conducting different types of suicide prevention initiatives. Even though many of these programs may lack adequate evidence about their effectiveness and efficacy, they reflect culturally specific and locally applicable experiences.

These implementation initiatives generally adopt the prevention framework defined by Silverman et al. (80, 81) that categorizes suicide prevention interventions into 3 levels—universal, selective, or indicated—based on how their target groups are defined. Universal interventions target whole populations, with the aim of shifting risk factors across the entire population. Selective interventions target subgroups that have not yet manifested suicidal behaviors but exhibit risk factors that may predispose them (e.g., depression). Indicated interventions are designed for people already beginning to show suicidal thoughts or behaviors.

A list of intervention programs implemented in Asia is shown in Web Table 1 (posted on the *Epidemiologic Reviews* Web site ([www.epirev.oxfordjournals.org](http://www.epirev.oxfordjournals.org))). It is evident that these programs are mainly from a limited number of countries, where there is greater readiness to implement preventive measures and, probably, with more available resources to allow for interventions. Many developing countries in Asia lack coordinated national suicide prevention plans. Mental health providers in these areas are severely underresourced (5, 82), and there is a heavy reliance on nongovernment organizations to provide suicide prevention services. Such services typically take the form of crisis centers or hotline services, usually staffed by volunteers. Most of these interventions/services are not included in Web Table 1 because of a lack of published information about the evaluation of their outcomes in relation to suicide.

Of the 26 studies listed in Web Table 1, 6 programs focused on restriction of suicide means (83–88) and 13 on psychosocial education (89–94). Most programs ( $n = 25$ ) did not need regular input from health care professionals, and the estimated cost was at the low or low/medium level. In total, 6 of them were effective and 17 were promising in terms of reducing suicide-related outcomes.

However, 3 caveats are worthy of caution. First, 6 studies evaluated intermediate outcomes (e.g., whether media reporting guidelines were followed, whether knowledge of suicide improved, level of acceptance/use of lockable pesticide storage boxes) (87, 88, 95–99), and no solid evidence

linked these outcome measures to the change in suicide rates. Second, not all interventions were equally beneficial to all age and sex subgroups. For example, in Japan, the intervention significantly reduced suicide rates for elderly females, whereas suicide rates for elderly men did not change prominently after the intervention (91–94). Third, maintaining the intervention effect is challenging; for instance, for the qigong intervention, the rate of depression returned to preintervention levels as the practice discontinued (96, 100).

A centrally coordinated government suicide prevention effort is currently lacking in most countries in Asia except in Taiwan, South Korea, and Japan (5, 89, 101, 102). In these 3 countries, the governments have provided support to implement nationwide suicide prevention programs for the entire community. The models of prevention in these 3 countries, similar to those in many Western countries, cover multilevel preventive efforts including universal, selective, and indicative prevention strategies (5). In some populous countries (e.g., China, India, Indonesia), the demand for prevention efforts is high, but resources are limited and available programs are scarce. With a more detailed cost-effectiveness analysis, government and nongovernment organizations would be able to allocate resources more efficiently for different suicide prevention programs.

### DISCUSSION

In view of the diversity and heterogeneity of epidemiologic patterns and risk or protective factors for suicide in the Asian countries studied, suicide prevention programs should be closely examined to determine whether they are directly relevant to local situations. Given the limited resources provided, understanding and implementing suicide prevention programs are extremely challenging and rewarding in terms of making a considerable impact on preventing a large number of suicides. On the basis of observations about epidemiologic characteristics, risk and protective factors, and some intervention programs in Asia, a list of priority areas that are important in helping to clarify and guide evidence-based suicide prevention programs catering to local needs is proposed.

#### Unique epidemiologic and socioeconomic characteristics of suicides

Several Asian countries such as Hong Kong, Korea, Japan, Taiwan, and Thailand experienced an increase in suicide rates during and after the Asian economic crisis of 1997 (28, 103). However, the impact on suicide rates from the economic recovery beginning in 2004 has been mixed. Suicide rates improved after the economic recovery in Hong Kong and Thailand (31, 103) but remained high in Japan, Taiwan, and South Korea (29, 64, 104). In other words, the economic slump is generally associated with an increase in suicide rates in Asia, but economic recovery is neither a necessary nor sufficient condition for suicide rates to improve (103).

The highest suicide rates for middle-aged men in Japan may reflect the neo-liberal restructuring of the corporate sectors. In the name of “labor flexibility,” the once-lifetime employment guarantee has been destroyed. Job insecurity and lack of social protection for the economically active group are

**Table 2.** Psychological Autopsy Studies Conducted in Asian Countries/Regions

| First Author, Year<br>(Reference No.) | Country/<br>Region | Sample Size <sup>a</sup>                                                | Sample                                                             | Study Design | Risk Factors                                                                                                                                                   |
|---------------------------------------|--------------------|-------------------------------------------------------------------------|--------------------------------------------------------------------|--------------|----------------------------------------------------------------------------------------------------------------------------------------------------------------|
| Phillips, 2002 (42)                   | China              | Case: 519; control (injury deaths): 536                                 | All age/sex groups                                                 | Case-control | Depression, previous suicide attempt, acute and chronic stress, low quality of life, interpersonal conflict, suicidal behavior in family or friends            |
| Zhang, 2004 (151)                     | China              | Case: 66; control: 66                                                   | All age/sex groups in rural areas                                  | Case-control | Mental disorders, acute life stress, poor physical health, low social status, poor social support, family disputes, religious belief                           |
| Conner, 2005 (126)                    | China              | 505 suicides                                                            | Age >18 years                                                      | Case series  | Women and younger individuals, acute stress, pesticides stored at home                                                                                         |
| Yang, 2005 (56)                       | China              | 895 suicides                                                            | All age/sex groups                                                 | Case series  | Availability of pesticide, high lethality of pesticide and limited availability, acute life stress (particularly for young, rural women)                       |
| Li, 2008 (43)                         | China              | Case: 114; control (unintentional injury deaths): 91                    | Ages 15–24 years                                                   | Case-control | Life events, depressive symptoms, low quality of life, acute stress, mental illness, prior suicide attempt                                                     |
| Zhang, 2009 (152)                     | China              | 105 suicides                                                            | Ages 15–34 years in rural areas                                    | Case series  | Depression, mental disorders, psychological strain, negative life events                                                                                       |
| Kasckow, 2010 (153)                   | China              | Case: 74; control (unintentional injury deaths): 24                     | Schizophrenics                                                     | Case-control | Depression, prior history of suicide attempt                                                                                                                   |
| Tong, 2010 (154)                      | China              | Case: 895; control (injury deaths): 701                                 | All age/sex groups                                                 | Case-control | Mood disorder, anxiety disorder, psychotic disorder, substance use disorder                                                                                    |
| Zhang, 2010 (52)                      | China              | Case: 392; control: 416                                                 | Ages 15–34 years in rural areas                                    | Case-control | Mental disorder, females, married, religious affiliation, impulsiveness, psychological strain                                                                  |
| Zhang, 2010 (44)                      | China              | Case: 392; control: 416                                                 | Ages 15–34 years in rural areas                                    | Case-control | Mental disorder, low educational level, not married, low social support, life event                                                                            |
| Chiu, 2004 (46)                       | Hong Kong          | Case: 70; control: 100                                                  | Aged ≥60 years                                                     | Case-control | Major depression, mental disorder, medical problems, history of past attempts                                                                                  |
| Chen, 2006 (155)                      | Hong Kong          | Case: 150; control: 150                                                 | All age/sex groups                                                 | Case-control | Unemployment, indebtedness, single, poor social support, psychiatric illness, history of past attempts                                                         |
| Chan, 2007 (55)                       | Hong Kong          | Case: 76; control (unemployed): 15                                      | Unemployed                                                         | Case-control | Male, psychiatric illness, previous suicide attempt, poor social problem-solving skills                                                                        |
| Wong, 2008 (45)                       | Hong Kong          | Case: 85; controls: 85                                                  | Ages 30–49 years                                                   | Case-control | Psychiatric disorder, indebtedness, unemployment, never married, living alone                                                                                  |
| Chan, 2009 (156)                      | Hong Kong          | Case (charcoal burning): 53; control (other suicides): 97               | Charcoal-burning suicide vs. suicide by other methods              | Case-control | Lower prevalence of schizophrenic spectrum disorder in charcoal-burning group                                                                                  |
| Wong, 2010 (51)                       | Hong Kong          | Case (gamblers): 150; control (suicide without gambling behaviors): 150 | Ages 15–59 years, gamblers vs. suicides without gambling behaviors | Case-control | Higher rates of psychiatric disorder, major depressive disorder, substance-use disorders, lower rate of psychiatric treatment seeking by gamblers              |
| Vijayakumar, 1999 (40)                | India              | Case: 100; control: 100                                                 | All age/sex groups                                                 | Case-control | Psychiatric disorder, family history of psychopathology, life event                                                                                            |
| Gururaj, 2004 (76)                    | India              | Case: 269; control: 269                                                 | All age/sex groups                                                 | Case-control | Previous suicide attempt, interpersonal conflicts, marital disharmony, alcoholism, mental illness, sudden economic bankruptcy, domestic violence, unemployment |
| Chavan, 2008 (157)                    | India              | 101 suicides                                                            | All age/sex groups                                                 | Case series  | Young males, migrant, psychosocial stressors, psychiatric illness                                                                                              |
| Manoranjitham, 2010 (41)              | India              | Case: 100; control: 100                                                 | All age/sex groups                                                 | Case-control | Psychiatric disorder, stress, chronic pain, living alone, relationship breakup                                                                                 |



|                         |                  |                                                |                                                                 |              |                                                                                                                                                                        |
|-------------------------|------------------|------------------------------------------------|-----------------------------------------------------------------|--------------|------------------------------------------------------------------------------------------------------------------------------------------------------------------------|
| Kurihara, 2009 (48)     | Indonesia (Bali) | Case: 60; control: 120                         | All age/sex groups                                              | Case-control | Mental disorders, low religious involvement, interpersonal problems                                                                                                    |
| Apter, 1993 (158)       | Israel           | 43 suicides                                    | Young males aged 18–21 years                                    | Case series  | Major depressive disorder; narcissistic and/or schizoid traits                                                                                                         |
| Arieli, 1996 (159)      | Israel           | 44 suicides                                    | Ethiopian Jews                                                  | Case series  | Male, married, depressed, psychiatric admissions, dissatisfied with their occupation                                                                                   |
| Amagasa, 2005 (50)      | Japan            | 22 suicides                                    | Case series of work-related suicide                             | Case series  | Male, problems with promotion or transfer, low social support, high psychological demand, low decision latitude and long working hours, depression, somatic complaints |
| Khan, 2008 (160)        | Pakistan         | Case: 100; control: 100                        | All age/sex groups                                              | Case-control | Psychiatric disorders (especially depression), being married, unemployment, negative and stressful life events                                                         |
| Abeyasinghe, 2008 (161) | Sri Lanka        | 372 suicides                                   | All age/sex groups in 3 rural districts                         | Case series  | Previous suicidal gestures, being depressed, male with alcohol dependence, family history of suicide, accessibility to pesticides                                      |
| Samaraweera, 2008 (162) | Sri Lanka        | 31 suicides                                    | All age/sex groups among Sinhalese                              | Case series  | Male, alcohol abuse, domestic violence                                                                                                                                 |
| Cheng, 1995 (47)        | Taiwan           | Case: 113; control: 226                        | Two aborigines (Atayal and Ami) and Han Chinese in rural Taiwan | Case-control | Depression, substance abuse, previous suicide attempt, family history of suicide and depression                                                                        |
| Cheng, 2000 (163)       | Taiwan           | Case: 113; control: 226                        | Two aborigines (Atayal and Ami) and Han Chinese in rural Taiwan | Case-control | Loss event, suicidal behavior in first-degree relatives, major depressive episode, emotionally unstable personality disorder, substance dependence                     |
| Lee, 2002 (164)         | Taiwan           | Case: 60; control: 120                         | Two native Taiwanese groups (Atayal and Ami)                    | Case-control | Low social assimilation in Atayal group and in men                                                                                                                     |
| Liu, 2011 (165)         | Taiwan           | Case: 113; control: 226                        | Two aborigines (Atayal and Ami) and Han Chinese                 | Case-control | Higher rates of substance dependence, emotionally unstable personality disorder, family history of suicidal behaviors, pesticide poisoning in Atayal group             |
| Altindag, 2005 (166)    | Turkey           | Case: 26; control (other causes of deaths): 25 | Females                                                         | Case-control | Young females, health problems, family disruption, negative social status                                                                                              |

<sup>a</sup> Unless otherwise specified, case indicates suicide cases, control indicates living controls.

related to the high level of suicides among middle-aged men in Japan (29). In fact, all of the changing corporate environments are occurring in several other developed Asian countries such as Korea, Hong Kong, and Taiwan, where there has also been a marked upsurge in suicides among middle-aged men in the past decade (28). Not only the pain induced by being unemployed but also the fear of losing one's job have induced tremendous stress in those still employed. Communities are facing excessive anxiety and stress brought about by a rapidly changing society, which might lead to an increase in suicide rates.

In South Korea, a steep increase in suicide rates is observed not only in the middle-aged group but also in older adults, where a 300% increase among adults older than age 64 years in the past 20 years is even more striking. Suicide rates in South Korea surpassed those in Japan after 2000, mainly because of this steep increase among the elderly (29). Unpreparedness for population aging and rapid breakdown of the traditional extended family system in South Korea have been proposed as possible explanations for the upsurge in suicides among older adults (29, 64). Globalization and the cultural transition have resulted in disrupted traditional values and norms the elderly hold dear (21, 64).

Although Japan similarly faces the issue of population aging, its relatively well-developed welfare program for the elderly may have protected them and prevented an upsurge in suicides (105, 106). However, the growing number of never-married persons and couples without children entering old age in the community has become a major concern in meeting the physical and mental needs of the elderly without the support of their children (107).

Suicide rates in China have been halved in the past decade; the downward trend seems to parallel the process of urbanization and economic development (108–110). The decline is most prominent among young, rural women. It is hypothesized that the migration of young, rural women to urban cities has successfully helped them avoid 3 main risk factors for suicide: their subordinate position in the family, family disputes, and access to pesticides (111). It is anticipated that the proportion of people living in the urban areas will continue to increase and reach 50% in 2012 and 70% in 2030. Hence, if the rural and urban suicide patterns prevail, it is likely that the overall suicide rate in China will be reduced further in the near future. Of course, these predictions must be considered in light of the limitations of the quality of suicide data in China (4), wherein underreporting might be caused by sampling counts at surveillance regions (10, 11), and the criteria used to ascertain suicide may also affect suicide rates.

Similarly experiencing a dramatic decline in suicide rates, Sri Lanka has promulgated a series of legislative measures that systematically banned the most highly toxic pesticides (58), which may be a factor in the reduction in suicides. Setting up barriers for lethal methods helps reduce suicides, especially regarding impulsive ones that are prevalent in Asia. In interpreting the results, we also need to bear in mind the potential data quality problem (4).

A more systematic and organized effort to address suicide and its prevention should be initiated and evaluated. On the basis of the current review, there is a likely and considerable underestimation of the overall suicide burden in Asia.

For example, in India, it is estimated that the true figure may be up to 9 times higher than the official suicide figures reported (8). In Islamic countries, religious sanction against suicide may contribute to not only low incidence of suicide but also its underreporting (112). A good surveillance system to assess the scale and extent of the suicide problem will provide better information to guide policy and lead the development of effective suicide prevention programs.

### Risk and protective factors for suicide

The current review reveals that the profiles of risk and protective factors in Asia differ somewhat from those in Western countries. Risk factors that appear to be universal include mental disorders, alcohol-related disorders, and previous history of suicide attempt. In Western countries, about 90%–95% of suicide victims had mental illness (113). According to current psychological autopsy studies in Asia (Table 2), the highest frequencies of mental disorders among suicides came from studies in Taiwan (97%–100%) and Pakistan (96%). The lowest frequencies are those in China (45%–76%) and India (33.6%–88%). For the rest of the countries and regions, the values are in the range of 59%–85.7%.

Since more than half of the world's suicide cases are concentrated in China and India (114), and bearing in mind the limitations of psychological autopsy studies (49), we could reasonably infer that mental disorders reportedly have a much lower prevalence among suicide victims in Asia. Some factors are more specific to the region, such as the role of family disputes in female suicides and the impact of changing corporate practice on suicide of middle-aged men. These specific risk factors, coupled with available or culturally favorable suicide methods (often very lethal) in the region, may create very different suicide patterns than those in the West.

In many well-developed Asian countries, mental health care systems are more ready to provide services for groups at high risk of suicide. Treatment of depression and establishment of a case management program for suicide attempters are available. However, in these better resourced Asian countries, help-seeking barriers may arise from the social stigma still attached to mental illness (115, 116). Although stigmatization of mental disorders may be similarly prevalent in the West, the discrimination in the family-oriented Asian culture can be more severe because the stigma of mental illness influences the entire family (117). In developing Asian countries, the problem of access to mental health care not only arises from such stigmatization but also is severely affected by poor mental health provisions. In these countries, mental health care has not become a high health care priority, and the respective resources are scarce (118).

Because of poorly equipped emergency services in local hospitals in developing countries and the very lethal pesticides readily available, case fatality rates from any pesticide poisoning are very high (119, 120). Many suicide-attempt cases die before reaching the hospital. Even in well-resourced areas in Asia, because of the reluctance to seek psychiatric help, together with the high case fatality associated with common methods of suicide (e.g., jumping from buildings, charcoal burning), utilization of mental health care before suicide remains relatively low (121). These factors imply that more

community-based suicide intervention strategies should be more feasible and relevant in Asia (122).

Family dispute is a crucial precipitating factor for suicide among women in many Asian countries. Their low social status has been suggested as a potential link to the high suicide rates for Asian women involved in abusive family relationships (123, 124). In India and Sri Lanka, where arranged marriages remain prevalent, women marry at a very young age and are usually pressured to stay in the marriage despite abusive relationships (34). In China, the pressure to bear sons under the “one-child policy” and the relatively permissive cultural attitudes toward suicide may also explain the higher rates for young women (10, 123, 125). The easy access to highly lethal pesticides in rural areas in developing Asian countries is believed to result in “impulsive” and “low-planned” suicides among young women without preexisting mental disorders (10, 126).

Nonetheless, there should be caution against interpreting suicides among young women as simply “impulsive” and “reckless” decisions. In the traditional Confucian family system, the subordinate position of young women provides very little opportunities for self-expression (75). Thus, their suicide planning may be internal. Informant-based psychological autopsy studies are unlikely to capture the repressed frustrations.

Work or unemployment-related stresses are common precipitating factors for suicide among Asian men. The Confucian notion of hierarchy and familial relationships usually extends to enterprise as well (127–129). Rising unemployment rates during economic recessions in countries adopting Confucian values represent not only stress induced by economic crisis but also disruption of social orders and trust, resulting in a much steeper increase in suicide after economic downturns in Asia (28).

Findings regarding the protective role of religion in suicide are mixed in Asia, where a variety of religions are practiced. It is well known that suicide rates in Islamic countries are generally low because the Koran strictly prohibits suicide. In fact, all religions are against suicide. The promise of having a better next life by committing suicide to leave the present world and enter another one is a myth rather than reality. In view of its relatively low cost and possible high impact, support from religious groups and leaders can benefit suicide prevention in Asia.

Enhancing the quality of epidemiologic research on suicide in Asia is timely and warranted in order to provide evidence to understand the biomedical, socioeconomic, and psychological risks of and protective factors for suicide. It is also extremely important to assess how suicide deaths and suicide attempts are being accounted for in the disease burden to the community and their impact on affected families and friends (130). The economic cost of suicide in Hong Kong and Taiwan is estimated to be approximately US\$200 million and US\$1 billion, respectively (16, 17). However, relatively few resources are being allocated to combat the rise in suicide.

### Plausible suicide intervention strategies

On the basis of the current review of epidemiologic characteristics and risk/protective factors for suicide in Asia, social support is a protective factor for preventing suicidal behavior.

Strong family and community ties in Asia can be used to design appropriate community-based suicide intervention programs. Efforts of community-based stakeholders should be organized, recognized, and properly acknowledged so they will make their resources available in the communities to contribute to suicide prevention. Some proposed intervention strategies follow.

*Develop community-based suicide prevention programs.* The aim is to use community resources to enhance the connectivity of individuals in the community. Some programs have shown encouraging results by connecting the service provider to needy individuals (Web Table 1), such as the Eastern District Project on Prevention of Deliberate Self-Harm in Hong Kong (131) and community-based suicide prevention programs conducted in Japan (89, 101). These are all broad-based community programs that aim to empower the community as a whole. Other successful examples of community-based suicide prevention programs can also be found outside Asia (132).

*Restrict access to lethal means.* Restricting access to lethal means has been shown to be one of the most effective ways of preventing suicides (133). A number of interventions such as enacting gun control (134, 135), erecting barriers to prevent suicide by jumping (69, 136), placing restrictions on pesticides (58), repackaging paracetamol and salicylates (137), restricting sales of charcoal in the supermarket (83), and installing railway-platform screen doors are good examples (84). More effort to restrict lethal means should be made by the community. The rationale is to develop ways of limiting access to these means to delay any impulsive self-harm behaviors of vulnerable individuals (138). While achieving a balance between saving lives and the inconvenience of restrictions is challenging, a certain level of inconvenience is justifiable and acceptable when many valuable lives can be saved.

Studies from the West indicate that fencing potential jumping sites (mostly bridges) is an effective strategy to reduce suicide by jumping (136, 139). However, restricting access to potential jumping sites is particularly challenging in Asia, since most of the incidents occur at home (69, 70). Potential preventive measures include raising awareness among family members who share their homes with vulnerable individuals, monitoring entry to the tops of buildings, placing higher railings along balconies, raising awareness of building security guards, and enhancing building codes that incorporate safety measures into new buildings.

Although hanging is a common method of suicide in many Asian countries, prevention through method restriction is not possible for this highly lethal method; ligatures and ligature points are widely available (140). However, most hangings occur at home, and enhancing family awareness of suicide risk for vulnerable members is important. Method restriction to prevent hanging in a controlled environment such as jails or psychiatric institutions should also receive sufficient priority when implementing certain measures. For instance, monitoring and surveillance cameras make hanging in jail cells difficult, if not impossible.

*Improve media portrayal of suicide.* Media portrayal of suicide has been associated with copycat suicides, especially if the reported suicide is glorified or sensationalized or if the method is explicitly described (141–144). In addition,

media can be a source of misinformation about suicide, often simplistically giving the impression that it is caused predominantly by immediate stressors rather than being linked to mental illness and/or substance use/misuse (144). In addition, media can help enhance mental health literacy in the community. It is important to make use of available media channels (relatively less expensive) to educate high-risk groups, their gatekeepers, and the public to enhance mental health literacy, encourage help-seeking behaviors, and convey the message that suicide is preventable and mental illness treatable (145). Such public awareness programs can be developed through collaboration with local media professionals. The World Health Organization has developed guidelines to encourage responsible reporting of suicide (146). Many European countries, the United States, and some Asian countries have also developed guidelines (147).

It is well recognized that media glamorizing charcoal burning as a painless, peaceful, and effective suicide method is a crucial contributing factor to the rapid adoption of the method in Taiwan and Hong Kong (65, 103, 148, 149). In addition to charcoal burning, the chain reaction of the hydrogen sulfide suicide fad in Japan has prompted the national police agency in Japan to instruct Internet providers to shut down a number of Web sites that provided suicide information (150). In developed Asian countries, engaging media and regulating media that glamorize new suicide methods is an imperative task.

*Incorporate the component of evaluation into every suicide prevention program.* Most suicide prevention programs in Asia have not been rigorously evaluated using sound methodologies and controls. There are strong indications for developing detailed criteria and guidelines for evaluating the effectiveness of both innovative and existing programs to ensure that suicide prevention works. An evaluation framework can provide quality assurance and ensure and monitor proper implementation. Moreover, the framework needs to provide detailed instructions on how stated outcomes can be achieved. These factors are important in identifying the most cost-effective strategies.

## Conclusions

The epidemiologic characteristics and recent trends in suicide in Asia reflect specific sociocultural situations and economic transitions in the region. Some changes create social stress and may increase suicide rates, whereas others help reduce suicide risk factors. Nonetheless, research in Asia is still limited and sporadic. Without sound research evidence, a comprehensive and updated list of risk and protective suicide factors that can help identify the target groups will still be missing, and cost-effective interventions will not be possible. Moreover, suicide is a complex and multifaceted problem that often involves several interdisciplinary efforts for prevention.

In view of large population sizes with limited available resources, a public health approach that emphasizes community-based intervention strategies is viable and practical. The Asian suicide profiles clearly speak of the need to design more culturally sensitive interventions. Simply applying Western-based suicide prevention schemes without considering the specific Asian socioeconomic-cultural context will certainly fail in

providing relevant remedies. There are many challenges ahead and ample opportunities to make suicide prevention work and work well in Asia.

## ACKNOWLEDGMENTS

Author affiliations: Taipei City Psychiatric Centre, Taipei City Hospital, Taipei, Taiwan (Ying-Yeh Chen); Institute of Public Health and Department of Public Health, National Yang-Ming University, Taipei, Taiwan (Ying-Yeh Chen); Department of Social Medicine, School of Medicine, College of Medicine, National Taiwan University, Taipei, Taiwan (Kevin Chien-Chang Wu); Department of Psychiatry, National Taiwan University Hospital, Taipei, Taiwan (Kevin Chien-Chang Wu); Center for Suicide Research and Prevention, The University of Hong Kong, Hong Kong, China (Saman Yousuf, Paul S. F. Yip); and Department of Social Work and Social Administration, The University of Hong Kong, Hong Kong, China (Paul S. F. Yip).

This study was funded by a grant from the National Health Research Institute, Taiwan (NHRI-EX100-10024PC) and a GRF grant from the Hong Kong Government (RGC project code: HKU 784210 M).

Conflict of interest: none declared.

## REFERENCES

1. Beautrais AL. Suicide in Asia. *Crisis*. 2006;27(2):55–57.
2. World Health Organization. Mental health—suicide prevention (SUPRE). Geneva, Switzerland: World Health Organization; 2011. ([http://www.who.int/mental\\_health/prevention/suicide/suicideprevent/en/](http://www.who.int/mental_health/prevention/suicide/suicideprevent/en/)). (Accessed February 2, 2011).
3. Yip PSF. Introduction. In: Yip PSF, ed. *Suicide in Asia: Causes and Prevention*. Hong Kong, China: Hong Kong University Press; 2008:1–6.
4. Hendin H, Vijayakumar L, Bertolote JM, et al. Epidemiology of suicide in Asia. In: Hendin H, Phillips MR, Vijayakumar L, et al, eds. *Suicide and Suicide Prevention in Asia*. Geneva, Switzerland: World Health Organization; 2008:7–18.
5. Yip PSF, Law YW. *Towards Evidence-based Suicide Prevention Programmes*. Geneva, Switzerland: World Health Organization; 2010.
6. Vijayakumar L, Nagaraj K, Pirkis J, et al. Suicide in developing countries (1): frequency, distribution, and association with socioeconomic indicators. *Crisis*. 2005;26(3):104–111.
7. Vijayakumar L. Suicide and mental disorders in Asia. *Int Rev Psychiatry*. 2005;17(2):109–114.
8. Joseph A, Abraham S, Muliyil JP, et al. Evaluation of suicide rates in rural India using verbal autopsies, 1994–9. *BMJ*. 2003;326(7399):1121–1122.
9. Chang SS, Sterne JA, Lu TH, et al. ‘Hidden’ suicides amongst deaths certified as undetermined intent, accident by pesticide poisoning and accident by suffocation in Taiwan. *Soc Psychiatry Psychiatr Epidemiol*. 2010;45(2):143–152.
10. Phillips MR, Li X, Zhang Y. Suicide rates in China, 1995–99. *Lancet*. 2002;359(9309):835–840.
11. Ministry of Health of the People’s Republic of China. *Health Statistics Report, 2001–2009*. Beijing, China: Ministry of Health of the People’s Republic of China; 2001–2009.



12. World Health Organization. Mental health—country reports and charts available. Geneva, Switzerland: World Health Organization; 2011. ([http://www.who.int/mental\\_health/prevention/suicide/country\\_reports/en/index.html](http://www.who.int/mental_health/prevention/suicide/country_reports/en/index.html)). (Accessed February 2, 2011).
13. De Leo D, Milner A, Xiangdong W. Suicidal behavior in the Western Pacific region: characteristics and trends. *Suicide Life Threat Behav.* 2009;39(1):72–81.
14. Wei KC, Chua HC. Suicide in Asia. *Int Rev Psychiatry.* 2008;20(5):434–440.
15. World Health Organization. *World Health Report 2010*. Geneva, Switzerland: World Health Organization; 2010.
16. Law CK, Yip PS, Chen YY. The economic and potential years of life lost from suicide in Taiwan, 1997–2007. *Crisis.* 2011;32(3):152–159.
17. Yip PS, Liu KY, Law CK, et al. Social and economic burden of suicides in Hong Kong SAR: a year of life lost perspective. *Crisis.* 2005;26(4):156–159.
18. Yip PS, Liu KY, Law CK. Years of life lost from suicide in China, 1990–2000. *Crisis.* 2008;29(3):131–136.
19. Möller-Leimkühler AM. The gender gap in suicide and premature death or: why are men so vulnerable? *Eur Arch Psychiatry Clin Neurosci.* 2003;253(1):1–8.
20. Yip PS, Liu KY. The ecological fallacy and the gender ratio of suicide in China. *Br J Psychiatry.* 2006;189:465–466.
21. Yip PS, Tan RC. Suicides in Hong-Kong and Singapore: a tale of two cities. *Int J Soc Psychiatry.* 1998;44(4):267–279.
22. Chen YY, Park NS, Lu TH. Suicide methods used by women in Korea, Sweden, Taiwan and the United States. *J Formos Med Assoc.* 2009;108(6):452–459.
23. Parker G, Yap HL. Suicide in Singapore: a changing sex ratio over the last decade. *Singapore Med J.* 2001;42(1):11–14.
24. Chen YY, Yip PS. Suicide sex ratios after the inception of charcoal-burning suicide in Taiwan and Hong Kong. *J Clin Psychiatry.* 2011;72(4):566–567.
25. Pritchard C, Baldwin DS. Elderly suicide rates in Asian and English-speaking countries. *Acta Psychiatr Scand.* 2002;105(4):271–275.
26. Chiu HF, Takahashi Y, Suh GH. Elderly suicide prevention in East Asia. *Int J Geriatr Psychiatry.* 2003;18(11):973–976.
27. Liu HL. Epidemiologic characteristics and trends of fatal suicides among the elderly in Taiwan. *Suicide Life Threat Behav.* 2009;39(1):103–113.
28. Chang SS, Gunnell D, Sterne JA, et al. Was the economic crisis 1997–1998 responsible for rising suicide rates in East/Southeast Asia? A time-trend analysis for Japan, Hong Kong, South Korea, Taiwan, Singapore and Thailand. *Soc Sci Med.* 2009;68(7):1322–1331.
29. Kim SY, Kim MH, Kawachi I, et al. Comparative epidemiology of suicide in South Korea and Japan: effects of age, gender and suicide methods. *Crisis.* 2011;32(1):5–14.
30. Lotrakul M. Thailand. In: Yip PSF, ed. *Suicide in Asia: Causes and Prevention*. Hong Kong, China: Hong Kong University Press; 2008:81–100.
31. Lotrakul M. Suicide in Thailand during the period 1998–2003. *Psychiatry Clin Neurosci.* 2006;60(1):90–95.
32. Hirsch JK. A review of the literature on rural suicide: risk and protective factors, incidence, and prevention. *Crisis.* 2006;27(4):189–199.
33. Judd F, Cooper AM, Fraser C, et al. Rural suicide—people or place effects? *Aust N Z J Psychiatry.* 2006;40(3):208–216.
34. Vijayakumar L, Pirkis J, Huong TT, et al. Socio-economic, cultural and religious factors affecting suicide prevention in Asia. In: Hendin H, Phillips MR, Vijayakumar L, et al, eds. *Suicide and Suicide Prevention in Asia*. Geneva, Switzerland: World Health Organization; 2008:19–30.
35. Gajalakshmi V, Peto R. Suicide rates in rural Tamil Nadu, South India: verbal autopsy of 39 000 deaths in 1997–98. *Int J Epidemiol.* 2007;36(1):203–207.
36. Yip PS, Callanan C, Yuen HP. Urban/rural and gender differentials in suicide rates: east and west. *J Affect Disord.* 2000;57(1–3):99–106.
37. Chang SS, Sterne JA, Wheeler BW, et al. Geography of suicide in Taiwan: spatial patterning and socioeconomic correlates. *Health Place.* 2011;17(2):641–650.
38. Otsu A, Araki S, Sakai R, et al. Effects of urbanization, economic development, and migration of workers on suicide mortality in Japan. *Soc Sci Med.* 2004;58(6):1137–1146.
39. Law S, Liu P. Suicide in China: unique demographic patterns and relationship to depressive disorder. *Curr Psychiatry Rep.* 2008;10(1):80–86.
40. Vijayakumar L, Rajkumar S. Are risk factors for suicide universal? A case-control study in India. *Acta Psychiatr Scand.* 1999;99(6):407–411.
41. Manoranjitham SD, Rajkumar AP, Thangadurai P, et al. Risk factors for suicide in rural south India. *Br J Psychiatry.* 2010;196(1):26–30.
42. Phillips MR, Yang G, Zhang Y, et al. Risk factors for suicide in China: a national case-control psychological autopsy study. *Lancet.* 2002;360(9347):1728–1736.
43. Li XY, Phillips MR, Zhang YP, et al. Risk factors for suicide in China's youth: a case-control study. *Psychol Med.* 2008;38(3):397–406.
44. Zhang J, Xiao S, Zhou L. Mental disorders and suicide among young rural Chinese: a case-control psychological autopsy study. *Am J Psychiatry.* 2010;167(7):773–781.
45. Wong PW, Chan WS, Chen EY, et al. Suicide among adults aged 30–49: a psychological autopsy study in Hong Kong. *BMC Public Health.* 2008;8:147.
46. Chiu HF, Yip PS, Chi I, et al. Elderly suicide in Hong Kong—a case-controlled psychological autopsy study. *Acta Psychiatr Scand.* 2004;109(4):299–305.
47. Cheng AT. Mental illness and suicide. A case-control study in east Taiwan. *Arch Gen Psychiatry.* 1995;52(7):594–603.
48. Kurihara T, Kato M, Reverger R, et al. Risk factors for suicide in Bali: a psychological autopsy study. *BMC Public Health.* 2009;9:327.
49. Phillips MR. Rethinking the role of mental illness in suicide. *Am J Psychiatry.* 2010;167(7):731–733.
50. Amagasa T, Nakayama T, Takahashi Y. Karojisatsu in Japan: characteristics of 22 cases of work-related suicide. *J Occup Health.* 2005;47(2):157–164.
51. Wong PW, Chan WS, Conwell Y, et al. A psychological autopsy study of pathological gamblers who died by suicide. *J Affect Disord.* 2010;120(1–3):213–216.
52. Zhang J, Wieczorek W, Conwell Y, et al. Characteristics of young rural Chinese suicides: a psychological autopsy study. *Psychol Med.* 2010;40(4):581–589.
53. Liu KY, Chen EY, Cheung AS, et al. Psychiatric history modifies the gender ratio of suicide: an East and West comparison. *Soc Psychiatry Psychiatr Epidemiol.* 2009;44(2):130–134.
54. Center for Suicide Research and Prevention. *Final Report of the Centre of Suicide Research and Prevention*. Hong Kong, China: The University of Hong Kong; 2006.
55. Chan WS, Yip PS, Wong PW, et al. Suicide and unemployment: what are the missing links? *Arch Suicide Res.* 2007;11(4):327–335.



56. Yang GH, Phillips MR, Zhou MG, et al. Understanding the unique characteristics of suicide in China: national psychological autopsy study. *Biomed Environ Sci*. 2005; 18(6):379–389.
57. Ajdacic-Gross V, Weiss MG, Ring M, et al. Methods of suicide: international suicide patterns derived from the WHO mortality database. *Bull World Health Organ*. 2008;86(9): 726–732.
58. Gunnell D, Fernando R, Hewagama M, et al. The impact of pesticide regulations on suicide in Sri Lanka. *Int J Epidemiol*. 2007;36(6):1235–1342.
59. Gunnell D, Eddleston M, Phillips MR, et al. The global distribution of fatal pesticide self-poisoning: systematic review. *BMC Public Health*. 2007;7:357.
60. Vijayakumar L. India. In: Yip PSF, ed. *Suicide in Asia: Causes and Prevention*. Hong Kong, China: Hong Kong University Press; 2008:121–132.
61. Lin JJ, Lu TH. Association between the accessibility to lethal methods and method-specific suicide rates: an ecological study in Taiwan. *J Clin Psychiatry*. 2006;67(7): 1074–1079.
62. Chen YY, Lu TH, Lee HJ, et al. Comparison of method-specific suicide rates between Taiwan and South Korea. *Taipei City Med J*. 2006;3(10):982–991.
63. Lee WJ, Cha ES, Park ES, et al. Deaths from pesticide poisoning in South Korea: trends over 10 years. *Int Arch Occup Environ Health*. 2009;82(3):365–371.
64. Park BCB, Lester D. South Korea. In: Yip PSF, ed. *Suicide in Asia: Causes and Prevention*. Hong Kong, China: Hong Kong University Press; 2008:19–30.
65. Liu KY, Beautrais A, Caine E, et al. Charcoal burning suicides in Hong Kong and urban Taiwan: an illustration of the impact of a novel suicide method on overall regional rates. *J Epidemiol Community Health*. 2007;61(3):248–253.
66. Lin JJ, Chang SS, Lu TH. The leading methods of suicide in Taiwan, 2002–2008. *BMC Public Health*. 2010;10:480.
67. Hitosugi M, Nagai T, Tokudome S. Proposal of new ICD code for suicide by charcoal burning. *J Epidemiol Community Health*. 2009;63(10):862–863.
68. Morii D, Miyagatani Y, Nakamae N, et al. Japanese experience of hydrogen sulfide: the suicide craze in 2008. *J Occup Med Toxicol*. 2010;5:28.
69. Chen YY, Yip PSF. Prevention of suicide by jumping: experiences from Taipei City (Taiwan), Hong Kong and Singapore. In: Wasserman D, Wasserman C, eds. *Oxford Textbook of Suicidology and Suicide Prevention*. New York, NY: Oxford University Press; 2009:569–572.
70. Chen YY, Gunnell D, Lu TH. Descriptive epidemiological study of sites of suicide jumps in Taipei, Taiwan. *Inj Prev*. 2009;15(1):41–44.
71. Copeland AR. Suicide by jumping from buildings. *Am J Forensic Med Pathol*. 1989;10(4):295–298.
72. Yip PS. Suicides in Hong Kong, 1981–1994. *Soc Psychiatry Psychiatr Epidemiol*. 1997;32(5):243–250.
73. Chia BH, Chia A, Yee NW, et al. Suicide trends in Singapore: 1955–2004. *Arch Suicide Res*. 2010;14(3):276–283.
74. Värnik A, Kõlves K, van der Feltz-Cornelis CM, et al. Suicide methods in Europe: a gender-specific analysis of countries participating in the “European Alliance Against Depression.” *J Epidemiol Community Health*. 2008;62(6):545–551.
75. Slote WH, Vos GAD, eds. *Confucianism and the Family*. Albany, NY: State University of the New York Press; 1998.
76. Gururaj G, Isaac MK, Subbakrishna DK, et al. Risk factors for completed suicides: a case-control study from Bangalore, India. *Inj Control Saf Promot*. 2004;11(3):183–191.
77. Yip PS, Wong PW, Cheung YT, et al. An empirical study of characteristics and types of homicide-suicides in Hong Kong, 1989–2005. *J Affect Disord*. 2009;112(1-3):184–192.
78. Rehkopf DH, Buka SL. The association between suicide and the socio-economic characteristics of geographical areas: a systematic review. *Psychol Med*. 2006;36(2):145–157.
79. Takai M, Yamamoto K, Iwamitsu Y, et al. Exploration of factors related to hara-kiri as a method of suicide and suicidal behavior. *Eur Psychiatry*. 2010;25(7):409–413.
80. Silverman MM, Felner RD. Suicide prevention programs: issues of design, implementation, feasibility, and developmental appropriateness. *Suicide Life Threat Behav*. 1995; 25(1):92–104.
81. Silverman MM, Maris RW. The prevention of suicidal behaviors: an overview. *Suicide Life Threat Behav*. 1995; 25(1):10–21.
82. Vijayakumar L, Pirkis J, Whiteford H. Suicide in developing countries (3): prevention efforts. *Crisis*. 2005;26(3):120–124.
83. Yip PS, Law CK, Fu KW, et al. Restricting the means of suicide by charcoal burning. *Br J Psychiatry*. 2010;196(3):241–242.
84. Law CK, Yip PS, Chan WS, et al. Evaluating the effectiveness of barrier installation for preventing railway suicides in Hong Kong. *J Affect Disord*. 2009;114(1-3):254–262.
85. Vijayakumar L, Satheesh-Babu R. Does ‘no pesticide’ reduce suicides? *Int J Soc Psychiatry*. 2009;55(5):401–406.
86. Yamasawa K, Nishimukai H, Ohbora Y, et al. A statistical study of suicides through intoxication. *Acta Med Leg Soc (Liege)*. 1980;30(3):187–192.
87. Hawton K, Ratnayake L, Simkin S, et al. Evaluation of acceptability and use of lockable storage devices for pesticides in Sri Lanka that might assist in prevention of self-poisoning. *BMC Public Health*. 2009;9:69.
88. Konradsen F, Pieris R, Weerasinghe M, et al. Community uptake of safe storage boxes to reduce self-poisoning from pesticides in rural Sri Lanka. *BMC Public Health*. 2007;7:13.
89. Oyama H, Koida J, Sakashita T, et al. Community-based prevention for suicide in elderly by depression screening and follow-up. *Community Ment Health J*. 2004;40(3):249–263.
90. Lee Y, Baek M. Suicide prevention program for adolescence. Presented at Six Awardees of the “Acknowledgement Scheme for Good Practices of Suicide Prevention in the Asia Pacific Region” of the 3rd Asia Pacific Regional Conference of International Association of Suicide Prevention, IASP, Hong Kong SAR, China, October 31–November 3, 2008.
91. Oyama H, Watanabe N, Ono Y, et al. Community-based suicide prevention through group activity for the elderly successfully reduced the high suicide rate for females. *Psychiatry Clin Neurosci*. 2005;59(3):337–344.
92. Oyama H, Goto M, Fujita M, et al. Preventing elderly suicide through primary care by community-based screening for depression in rural Japan. *Crisis*. 2006;27(2):58–65.
93. Oyama H, Ono Y, Watanabe N, et al. Local community intervention through depression screening and group activity for elderly suicide prevention. *Psychiatry Clin Neurosci*. 2006;60(1):110–114.
94. Oyama H, Sakashita T, Ono Y, et al. Effect of community-based intervention using depression screening on elderly suicide risk: a meta-analysis of the evidence from Japan. *Community Ment Health J*. 2008;44(5):311–320.
95. Tsang HW, Cheung L, Lak DC. Qigong as a psychosocial intervention for depressed elderly with chronic physical illnesses. *Int J Geriatr Psychiatry*. 2002;17(12):1146–1154.
96. Tsang HW, Fung KM, Chan AS, et al. Effect of a qigong exercise programme on elderly with depression. *Int J Geriatr Psychiatry*. 2006;21(9):890–897.

97. Centre for Suicide Research and Prevention. *Research Findings Into Suicide and its Prevention—Final Report 2005 July (Report)*. Hong Kong, China: The University of Hong Kong; 2005.
98. Chan SW, Chien WT, Tso S. The qualitative evaluation of a suicide prevention and management programme by general nurses. *J Clin Nurs*. 2008;17(21):2884–2894.
99. Fu KW, Yip PS. Changes in reporting of suicide news after the promotion of the WHO media recommendations. *Suicide Life Threat Behav*. 2008;38(5):631–636.
100. Bowles JR. Suicide in Western Samoa: an example of a suicide prevention program in a developing country. In: Diekstra R, ed. *Preventive Strategies on Suicide*. Leiden, The Netherlands: Brill; 1995:173–206.
101. Motohashi Y, Kaneko Y, Sasaki H, et al. A decrease in suicide rates in Japanese rural towns after community-based intervention by the health promotion approach. *Suicide Life Threat Behav*. 2007;37(5):593–599.
102. Lee MB, Tai CW, Liao SC, et al. The strategy and prospects of suicide prevention in Taiwan [in Chinese]. *Hu Li Za Zhi*. 2006;53(6):5–13.
103. Chen YY, Yip PS, Lee C, et al. Economic fluctuations and suicide: a comparison of Taiwan and Hong Kong. *Soc Sci Med*. 2010;71(12):2083–2090.
104. Inoue K, Nishimura Y, Nishida A, et al. Relationships between suicide and three economic factors in South Korea. *Leg Med (Tokyo)*. 2010;12(2):100–101.
105. Chen J, Choi YJ, Sawada Y. How is suicide different in Japan? *Jpn World Econ*. 2009;21(2):140–150.
106. Cho C. The pension reform and income security policy for elderly of Japan [in Korean]. *J Welf Aged*. 2006;32:31–68.
107. Yip PS, Cheung KSL, Law CK, et al. The demographic window and economic dependency ratio in Hong Kong SAR. *Asian Popul Stud*. 2010;6(2):241–260.
108. Zhang J, Ma J, Jia C, et al. Economic growth and suicide rate changes: a case in China from 1982 to 2005. *Eur Psychiatry*. 2010;25(3):159–163.
109. Yip PS, Liu KY, Hu J, et al. Suicide rates in China during a decade of rapid social changes. *Soc Psychiatry Psychiatr Epidemiol*. 2005;40(10):792–798.
110. Liu KY, Yip PSF. Mainland China. In: Yip PSF, ed. *Suicide in Asia: Causes and Prevention*. Hong Kong, China: Hong Kong University Press; 2008:31–48.
111. Jing J, Wu X, Zhang J. Research on the migration of rural women and the decline of Chinese suicide rate. *J China Agricultural University*. 2010;27(4):20–31.
112. Pritchard C, Amanullah S. An analysis of suicide and undetermined deaths in 17 predominantly Islamic countries contrasted with the UK. *Psychol Med*. 2007;37(3):421–430.
113. Windfuhr K, Kapur N. International perspectives on the epidemiology and aetiology of suicide and self-harm. In: O'Connor RC, Platt S, Gordon J, eds. *International Handbook of Suicide Prevention*. Chichester, United Kingdom: Wiley-Blackwell; 2011:27–58.
114. Vijayakumar L. Suicide prevention: the urgent need in developing countries. *World Psychiatry*. 2004;3(3):158–159.
115. Lee S, Chiu MY, Tsang A, et al. Stigmatizing experience and structural discrimination associated with the treatment of schizophrenia in Hong Kong. *Soc Sci Med*. 2006;62(7):1685–1696.
116. Kleinman AM. Depression, somatization and the “new cross-cultural psychiatry.” *Soc Sci Med*. 1977;11(1):3–10.
117. Lauber C, Rössler W. Stigma towards people with mental illness in developing countries in Asia. *Int Rev Psychiatry*. 2007;19(2):157–178.
118. Meshvara D. Mental health and mental health care in Asia. *World Psychiatry*. 2002;1(2):118–120.
119. Mohamed F, Perera A, Wijayaweera K, et al. The prevalence of previous self-harm amongst self-poisoning patients in Sri Lanka. *Soc Psychiatry Psychiatr Epidemiol*. 2011;46(6):517–520.
120. Eddleston M, Gunnell D, Karunaratne A, et al. Epidemiology of intentional self-poisoning in rural Sri Lanka. *Br J Psychiatry*. 2005;187:583–584.
121. Chen YY, Liao SC, Lee MB. Health care use by victims of charcoal-burning suicide in Taiwan. *Psychiatr Serv*. 2009;60(1):126.
122. Chen YY, Yip PS. Rethinking suicide prevention in Asian countries. *Lancet*. 2008;372(9650):1629–1630.
123. Pearson V. Goods on which one loses: women and mental health in China. *Soc Sci Med*. 1995;41(8):1159–1173.
124. Liu M. Rebellion and revenge: the meaning of suicide of women in rural China. *Int J Welf*. 2002;11(4):300–309.
125. Ji J, Kleinman A, Becker AE. Suicide in contemporary China: a review of China's distinctive suicide demographics in their sociocultural context. *Harv Rev Psychiatry*. 2001;9(1):1–12.
126. Conner KR, Phillips MR, Meldrum S, et al. Low-planned suicides in China. *Psychol Med*. 2005;35(8):1197–1204.
127. Chan GKY. The relevance and value of Confucianism in contemporary business ethics. *J Bus Ethics*. 2008;77(3):347–360.
128. Ornatoski GK. Confucian ethics and economic development: a study of the adaptation of Confucian values to modern Japanese economic ideology and institutions. *J Soc Econ*. 1996;25(5):571–590.
129. Kim SK, Finch J. Confucian patriarchy reexamined: Korean families and the IMF economic crisis. *Good Soc*. 2002;11(3):43–49.
130. Sharan P, Gallo C, Gureje O, et al. Mental health research priorities in low- and middle-income countries of Africa, Asia, Latin America and the Caribbean. World Health Organization-Global Forum for Health Research—Mental Health Research Mapping Project Group. *Br J Psychiatry*. 2009;195(4):354–363.
131. Centre for Suicide Research and Prevention, Faculty of Social Sciences, The University of Hong Kong. Cherishing life, nourishing hope. *CSRP Newsletter*. February 2009.
132. Hadlaczy G, Wasserman D, Hoven CW, et al. Suicide prevention strategies: case studies from across the globe. In: O'Connor RC, Platt S, Gordon J, eds. *International Handbook of Suicide Prevention*. Chichester, United Kingdom: Wiley-Blackwell; 2011:475–485.
133. Mann JJ, Apter A, Bertolote J, et al. Suicide prevention strategies: a systematic review. *JAMA*. 2005;294(16):2064–2074.
134. Chapman S, Alpers P, Agho K, et al. Australia's 1996 gun law reforms: faster falls in firearm deaths, firearm suicides, and a decade without mass shootings. *Inj Prev*. 2006;12(6):365–372.
135. Snowdon J, Harris L. Firearms suicides in Australia. *Med J Aust*. 1992;156(2):79–83.
136. Beautrais A. Suicide by jumping. A review of research and prevention strategies. *Crisis*. 2007;28(suppl 1):58–63.
137. Hawton K. United Kingdom legislation on pack sizes of analgesics: background, rationale, and effects on suicide and deliberate self-harm. *Suicide Life Threat Behav*. 2002;32(3):223–229.
138. Chen YY, Wu KCC, Yip PSF. Suicide prevention through restricting access to suicide. In: O'Connor RC, Platt S, Gordon J, eds. *International Handbook of Suicide Prevention*. Chichester, United Kingdom: Wiley-Blackwell; 2011:545–560.
139. Gunnell D, Nowers M. Suicide by jumping. *Acta Psychiatr Scand*. 1997;96(1):1–6.

140. Gunnell D, Bennewith O, Hawton K, et al. The epidemiology and prevention of suicide by hanging: a systematic review. *Int J Epidemiol*. 2005;34(2):433–442.
141. Fu KW, Yip PS. Estimating the risk for suicide following the suicide deaths of 3 Asian entertainment celebrities: a meta-analytic approach. *J Clin Psychiatry*. 2009;70(6):869–878.
142. Chen YY, Chen F, Yip PS. The impact of media reporting of suicide on actual suicides in Taiwan, 2002–05. *J Epidemiol Community Health*. 2011;65(10):934–940.
143. Chen YY, Liao SF, Teng PR, et al. The impact of media reporting of the suicide of a singer on suicide rates in Taiwan. *Soc Psychiatry Psychiatr Epidemiol*. Advance Access: December 17, 2010. (doi: 10.1007/s00127-010-0331-y).
144. Hawton K, Williams K. Media influences on suicidal behavior: evidence and prevention. In: Hawton K, ed. *Prevention and Treatment of Suicidal Behavior: From Science to Practice*. Oxford, United Kingdom: Oxford University Press; 2005: 293–306.
145. Pirkis J, Nordentoft M. Media influences on suicide and attempted suicide. In: O'Connor RC, Platt S, Gordon J, eds. *International Handbook of Suicide Prevention*. Chichester, United Kingdom: Wiley-Blackwell; 2011:531–544.
146. World Health Organization. *Preventing Suicide: A Resource for Media Professionals*. Geneva, Switzerland: World Health Organization; 2008.
147. Pirkis J, Blood RW, Beautrais A, et al. Media guidelines on the reporting of suicide. *Crisis*. 2006;27(2):82–87.
148. Tsai CW, Gunnell D, Chou YH, et al. Why do people choose charcoal burning as a method of suicide? An interview based study of survivors in Taiwan. *J Affect Disord*. 2011;131(1-3): 402–407.
149. Yip PSF, Lee DTS. Charcoal-burning suicides and strategies for prevention. *Crisis*. 2007;28(suppl 1):21–27.
150. Truscott A. Suicide fad threatens neighbours, rescuers. *CMAJ*. 2008;179(4):312–313.
151. Zhang J, Conwell Y, Zhou L, et al. Culture, risk factors and suicide in rural China: a psychological autopsy case control study. *Acta Psychiatr Scand*. 2004;110(6):430–437.
152. Zhang J, Dong N, Delprino R, et al. Psychological strains found from in-depth interviews with 105 Chinese rural youth suicides. *Arch Suicide Res*. 2009;13(2):185–194.
153. Kasckow J, Liu N, Haas GL, et al. Case-control study of the relationship of depressive symptoms to suicide in a community-based sample of individuals with schizophrenia in China. *Schizophr Res*. 2010;122(1-3):226–231.
154. Tong Y, Phillips MR. Cohort-specific risk of suicide for different mental disorders in China. *Br J Psychiatry*. 2010; 196(6):467–473.
155. Chen EY, Chan WS, Wong PW, et al. Suicide in Hong Kong: a case-control psychological autopsy study. *Psychol Med*. 2006;36(6):815–825.
156. Chan SS, Chiu HF, Chen EY, et al. What does psychological autopsy study tell us about charcoal burning suicide—a new and contagious method in Asia? *Suicide Life Threat Behav*. 2009;39(6):633–638.
157. Chavan BS, Singh GP, Kaur J, et al. Psychological autopsy of 101 suicide cases from northwest region of India. *Indian J Psychiatry*. 2008;50(1):34–38.
158. Apter A, Bleich A, King RA, et al. Death without warning? A clinical postmortem study of suicide in 43 Israeli adolescent males. *Arch Gen Psychiatry*. 1993;50(2):138–142.
159. Arieli A, Gilat I, Aycheh S. Suicide among Ethiopian Jews: a survey conducted by means of a psychological autopsy. *J Nerv Ment Dis*. 1996;184(5):317–319.
160. Khan MM, Mahmud S, Karim MS, et al. Case-control study of suicide in Karachi, Pakistan. *Br J Psychiatry*. 2008;193(5): 402–405.
161. Abeyasinghe R, Gunnell D. Psychological autopsy study of suicide in three rural and semi-rural districts of Sri Lanka. *Soc Psychiatry Psychiatr Epidemiol*. 2008;43(4):280–285.
162. Samaraweera S, Sumathipala A, Siribaddana S, et al. Completed suicide among Sinhalese in Sri Lanka: a psychological autopsy study. *Suicide Life Threat Behav*. 2008; 38(2):221–228.
163. Cheng AT, Chen TH, Chen CC, et al. Psychosocial and psychiatric risk factors for suicide. Case-control psychological autopsy study. *Br J Psychiatry*. 2000;177:360–365.
164. Lee CS, Chang JC, Cheng AT. Acculturation and suicide: a case-control psychological autopsy study. *Psychol Med*. 2002;32(1):133–141.
165. Liu IC, Liao SF, Lee WC, et al. A cross-ethnic comparison on incidence of suicide. *Psychol Med*. 2011;41(6):1213–1221.
166. Altindag A, Ozkan M, Oto R. Suicide in Batman, south-eastern Turkey. *Suicide Life Threat Behav*. 2005;35(4): 478–482.

## APPENDIX

### Sources of Data for Figures 1–3

- Hong Kong:** Centre for Suicide Research and Prevention. <http://csrp.hku.hk/WEB/eng/index.asp>
- India:** National Crime Records Bureau, Ministry of Home Affairs. Chapter 2: Suicides in India. [http://maithrikochi.org/india\\_suicide\\_statistics.htm#incidence](http://maithrikochi.org/india_suicide_statistics.htm#incidence). <http://ncrb.nic.in/CD-ADSI2009/suicides-09.pdf>
- Japan:** Ministry of Health, Labour and Welfare, Japan 人口動態統計の年間推計(平成10–22年). <http://www.mhlw.go.jp/toukei/list/81-1a.html>
- Singapore:** Time Series on Population - Singapore Department of Statistics. <http://www.singstat.gov.sg/stats/themes/people/hist/popn.html>;
- Samaritans of Singapore - Suicide Statistics in Singapore. <http://www.samaritans.org.sg/Suicide%20Prevention%20tab/Suicide%20Statistics%20in%20Singapore%20-%201991%20to%202009.pdf>
- South Korea:** Causes of Death Statistics in 2009. <http://kostat.go.kr/portal/english/news/1/8/index.board?bmode=read&aSeq=199253>
- Sri Lanka:** Sri Lanka Sumithrayo - Statistics and Data Analysis. <http://www.srilankasumithrayo.org/statistics-a-data>
- Taiwan:** Department of Health, Executive Yuan, ROC. [http://www.doh.gov.tw/CHT2006/DM/DM2\\_2.aspx?now\\_fod\\_list\\_no=9531&class\\_no=440&level\\_no=4](http://www.doh.gov.tw/CHT2006/DM/DM2_2.aspx?now_fod_list_no=9531&class_no=440&level_no=4)
- Thailand:** The Bureau of Registration Administration, Ministry of Interior, Thailand. [http://www.who.or.jp/publications/2004-2005/CHP\\_Report\\_on\\_violence\\_and\\_health\\_Thailand.pdf](http://www.who.or.jp/publications/2004-2005/CHP_Report_on_violence_and_health_Thailand.pdf)
- Australia:** Australian Bureau of Statistics - 3309.0.55.001 - Suicides: Recent Trends, Australia, 1993 to 2003. <http://www.abs.gov.au/ausstats/abs@.nsf/0/A61B65AE88EBF976CA256DEF00724CDE?OpenDocument>
- United States:** International Data Base (IDB), United States <http://www.census.gov/ipc/www/idb/>
